# Supplementary material
Source: PubMed Central journal article supplement (PMC5207192)
Supplement: 10.1074_M116.740183_jbc.M116.740183-1.pdf [file 10.1074_M116.740183_jbc.M116.740183-1.pdf]

**SUPPLEMENTAL INFORMATION**

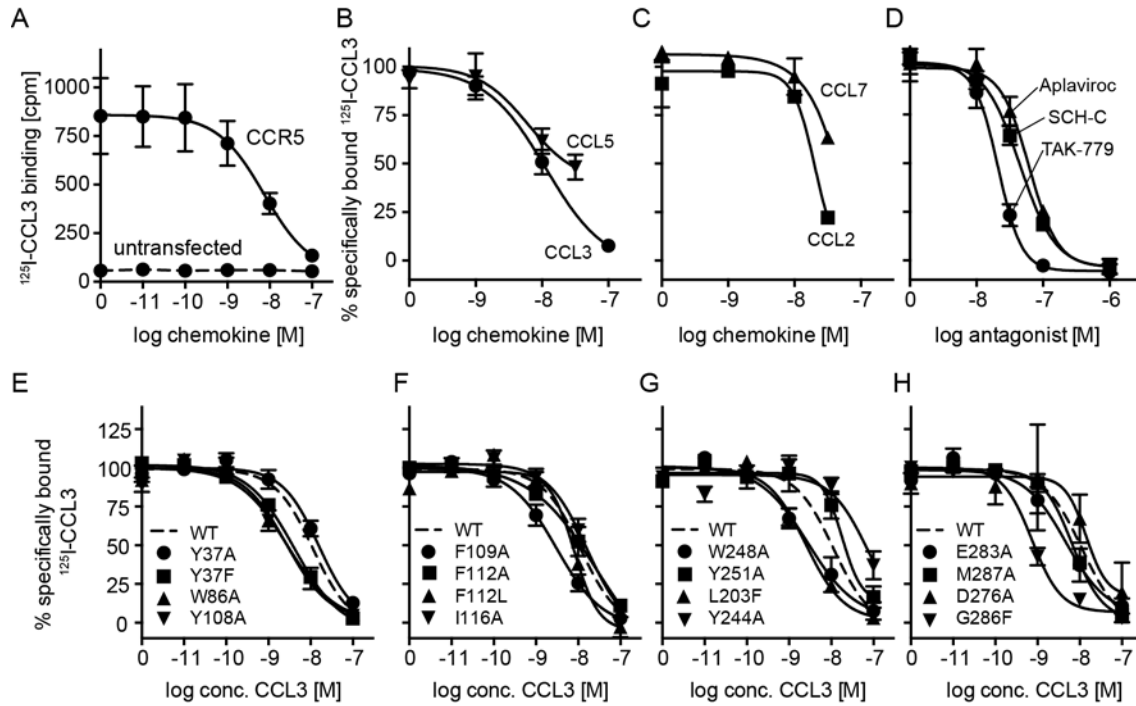

**Supplemental Fig. 1. Homo- and heterologous competition binding assays with <sup>125</sup>I-CCL3.** (A) Average of original CCL3 binding data in counts per minute (cpm); binding to COS-7 cells transiently transfected with CCR5 (drawn line) or untransfected COS-7 cells (stippled line). (B) Normalized curve of A (circle) and heterologous normalized curve for displacing by CCL5 (triangle). (C) Heterologous normalized curves for displacing by typical non-CCR5 binding chemokines CCL2 (square) and CCL7 (triangle), which indeed show much lower  $K_i$ . (D) Heterologous normalized curves for displacing by CCR5-specific antagonists Aplaviroc (triangle), SCH-C (square) and TAK-779 (circle, in fact also known to bind CCR2). (E-H) Homologous normalized CCL3-binding curves at WT (stippled line) and mutants as indicated. For  $B_{max}$  and  $K_D$  please refer to table 2. For all curves  $n \geq 3$ .
